# Supplementary material for: Benincasa hispida Extract Promotes Proliferation, Differentiation, and Mineralization of MC3T3-E1 Preosteoblasts and Inhibits the Differentiation of RAW 246.7 Osteoclast Precursors
Source: MDPI journal article supplement (doi:10.3390/app12178849), 2022-09-02
Supplement: s1 [file s1]

## Supplementary Materials

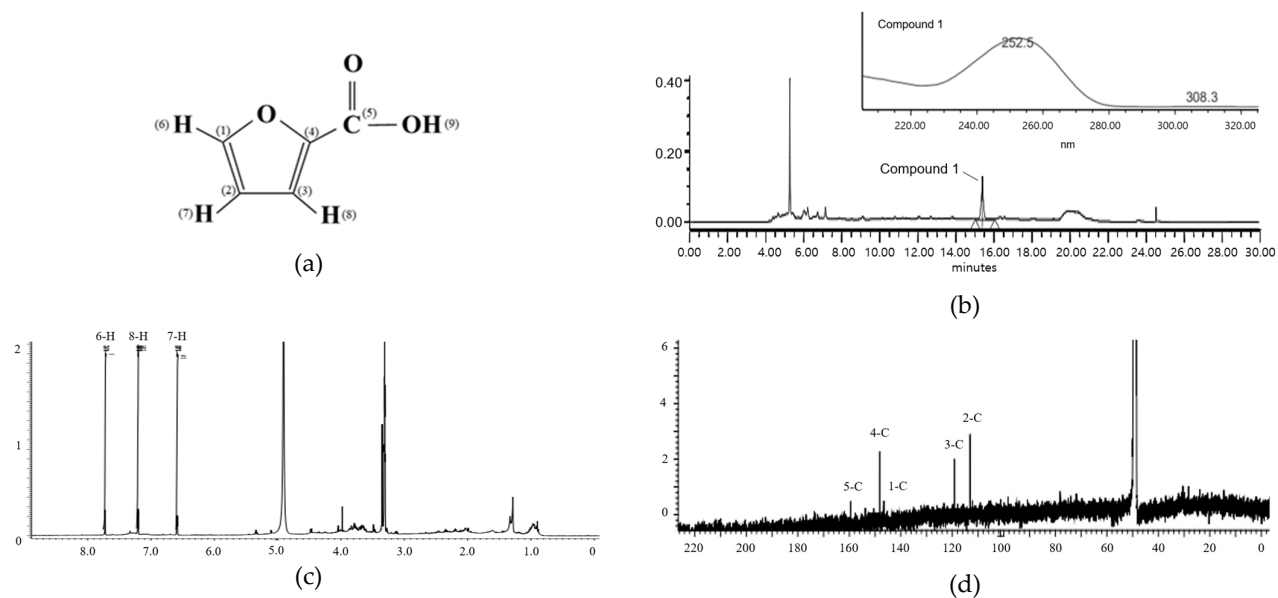

**Figure S1.** Structure of 2-furoic acid from HR1901-W (a). Chromatogram and PDA spectrum of *Benincasa hispida* extract (HR1901-W) separated and fractionated by preparative HPLC (b). HPLC  $^1\text{H}$ -NMR and  $^{13}\text{C}$ -NMR spectra (c, d) of HR1901-W.

**Table S1.** The content of 2-furoic acid in HR1901-W.

| Compound      | Regression Equation  | R <sup>2</sup> | Linear Range (μg/mL) | RSD (%) | Content of 2-furoic acid in HR1901-W (mg/g) |
|---------------|----------------------|----------------|----------------------|---------|---------------------------------------------|
| 2-Furoic acid | $y = 61103x + 18835$ | 1              | 6.25-100             | 1.82    | 0.37±0.01                                   |

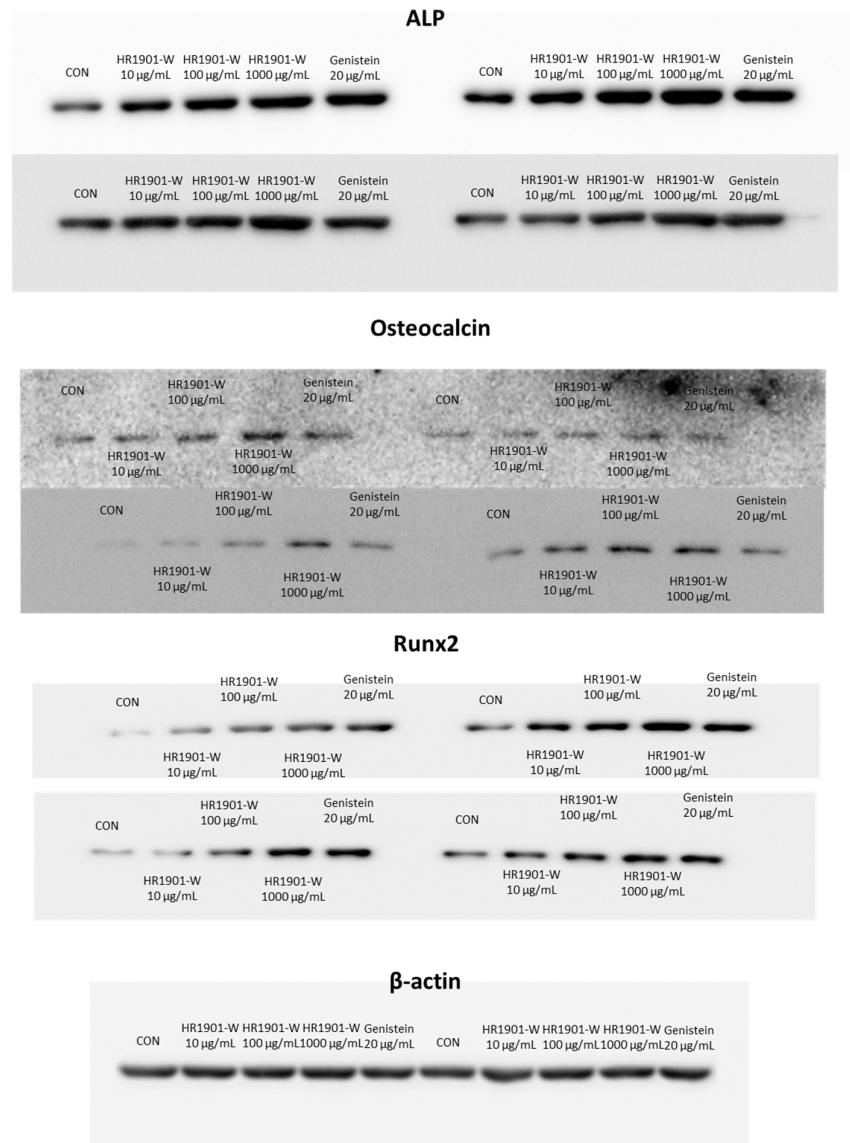

**Figure S2.** Original blots of Western blot. Original blots of Figure 4.
